# Supplementary material for: Detection of Anaplasma spp. and Ehrlichia spp. in dogs from a veterinary teaching hospital in Italy: a retrospective study 2012–2020
Source: Springer Nature journal article supplement (doi:10.1007/s11259-024-10358-4), 2024-03-27
Supplement: MOESM2 [file 11259_2024_10358_MOESM2_ESM.pdf]

**Detection of *Anaplasma* spp. and *Ehrlichia* spp. in dogs from a veterinary teaching hospital in Italy: a retrospective study 2012-2020**

Veronica Facile <sup>a</sup>, Maria Chiara Sabetti <sup>b</sup>, Andrea Balboni <sup>a</sup>, Lorenza Urbani <sup>a</sup>, Alessandro Tirolo <sup>b</sup>, Martina Magliocca <sup>a</sup>, Francesco Lunetta <sup>a</sup>, Francesco Dondi <sup>a\*</sup>, Mara Battilani <sup>a</sup>

<sup>a</sup> Department of Veterinary Medical Sciences, *Alma Mater Studiorum*-University of Bologna, Via Tolara di Sopra 50, 40064 Ozzano dell'Emilia, Bologna, Italy

<sup>b</sup> Department of Veterinary Sciences, University of Parma, Strada del Taglio 10, 43126 Parma, Italy

\* Corresponding author

Francesco Dondi

Department of Veterinary Medical Sciences, *Alma Mater Studiorum*-University of Bologna, Via Tolara di Sopra 50, 40064 Ozzano Emilia, Bologna, Italy

*E-mail:* f.dondi@unibo.it

**Online Resource 2** Complete blood count results of dogs tested positive for *Anaplasma* spp. and *Ehrlichia* spp. infection

| Variables                                | RI          | N  | Positives             | Positive to <i>A. ph</i> | Positive to <i>A. pl</i> | Positive to <i>E. ca</i> | Positive to <i>A. ph</i> and <i>E. ca</i> | P value |
|------------------------------------------|-------------|----|-----------------------|--------------------------|--------------------------|--------------------------|-------------------------------------------|---------|
|                                          |             |    | Median (range)        | Median (range)           |                          | Median (range)           | Median (range)                            |         |
| Hct (%)                                  | 39-58       | 63 | 37.8 (6-62.5)         | 44 (19-62.5)             | 28.4                     | 39.6 (10-55.3)           | 27.8 (6-55.4)                             | 0.1749  |
| Hb (gr%)                                 | 14-19       | 63 | 12.3 (1.8-20.4)       | 14.5 (6.7-20.4)          | 9.2                      | 13 (3.4-18.7)            | 9.1 (1.8-19)                              | 0.2869  |
| RBC (/mm <sup>3</sup> ) x10 <sup>6</sup> | 5.65-8.4    | 63 | 5.88 (0.75-43.8)      | 6.23 (27.8-77.7)         | 4.51                     | 5.42 (2.83-8.06)         | 5.88 (0.75-43.8)                          | 0.8593  |
| MCV (fL)                                 | 63-77       | 63 | 67.4 (51.5-86)        | 69.2 (64-78.4)           | 63.1                     | 66 (58.6-86)             | 66.2 (51.5-85.2)                          | 0.0656  |
| MCH (pg)                                 | 22-26       | 63 | 22.5 (15.4-28.2)      | 23.6 (20.7-24)           | 20.4                     | 22.1 (18.1-28.2)         | 22.3 (15.4-26.2)                          | 0.0842  |
| MCHC (g%)                                | 32-37       | 63 | 33.2 (29.8-36.6)      | 33.3 (31.3-34.9)         | 32.4                     | 33.5 (30.1-36.6)         | 33.2 (29.8-36.5)                          | 0.6888  |
| RDW (%)                                  | 11.6-14.6   | 63 | 13.5 (10.9-34.6)      | 13.2 (11.8-18)           | 16.1                     | 13.4 (11.2-34.6)         | 14.5 (10.9-29)                            | 0.4905  |
| Reticulocytes (/mm <sup>3</sup> )        | 0-120,000   | 63 | 31,500 (0.15-540,100) | 28,800 (0.4-339,000)     | 237,100                  | 41,000 (0.15-274,300)    | 30,100 (7500-540,100)                     | 0.3179  |
| PLT (/mm <sup>3</sup> ) x10 <sup>4</sup> | 15-50       | 63 | 16.3 (0.4-66.7)       | 26.35 (4.3-51)           | 28.2                     | 16.4 (0.8-66.7)          | 12.9 (0.4-43)                             | 0.1261  |
| MPV (fL)                                 | 8.3-13.6    | 63 | 13.9 (7.9-23.8)       | 13.7 (8.5-18.8)          | 13.5                     | 14.1 (7.9-23.3)          | 14.1 (9.2-23.8)                           | 0.8278  |
| Leukocytes (/mm <sup>3</sup> )           | 5000-14,000 | 63 | 8790 (260-76,350)     | 10,695 (1310-76,350)     | 12,590                   | 7790 (1710-35,300)       | 8790 (260-25,770)                         | 0.3211  |
| Lymphocytes (/mm <sup>3</sup> )          | 900-4000    | 63 | 2060 (110-12,750)     | 1810 (300-12,750)        | 3650                     | 2100 (420-5830)          | 2060 (110-5070)                           | 0.5958  |
| Monocytes (/mm <sup>3</sup> )            | 140-1000    | 63 | 530 (40-7290)         | 650 (90-7290)            | 800                      | 460 (80-4142)            | 540 (40-1830)                             | 0.3723  |
| Neutrophils (/mm <sup>3</sup> )          | 3000-10,000 | 63 | 5150 (60-54,380)      | 6790 (320-54,380)        | 7350                     | 4275 (410-12,967)        | 5340 (60-20,780)                          | 0.2495  |
| Eosinophils (/mm <sup>3</sup> )          | 10-1100     | 63 | 220 (10-4120)         | 285 (10-1080)            | 700                      | 220 (10-4120)            | 110 (10-410)                              | 0.1091  |
| Basophils (/mm <sup>3</sup> )            | 0-80        | 63 | 40 (10-720)           | 50 (10-720)              | 40                       | 50 (10-330)              | 30 (10-80)                                | 0.3028  |

*A. ph*: *Anaplasma phagocytophilum*; *A. pl*: *Anaplasma platys*; *E. ca*: *Ehrlichia canis*; Hb: haemoglobin concentration; HCT: haematocrit value; MCH: mean corpuscular haemoglobin; MCHC: mean cell haemoglobin concentration; MCV: mean corpuscular volume; MPV: mean platelet volume; N: number of dogs for which the data were available; PLT: platelet count; RBC: red blood cell count; RDW: red cell distribution width; RI: reference interval
