# Supplementary material for: Detection of Anaplasma spp. and Ehrlichia spp. in dogs from a veterinary teaching hospital in Italy: a retrospective study 2012–2020
Source: Springer Nature journal article supplement (doi:10.1007/s11259-024-10358-4), 2024-03-27
Supplement: MOESM3 [file 11259_2024_10358_MOESM3_ESM.pdf]

**Detection of *Anaplasma* spp. and *Ehrlichia* spp. in dogs from a veterinary teaching hospital in Italy: a retrospective study 2012-2020**

Veronica Facile <sup>a</sup>, Maria Chiara Sabetti <sup>b</sup>, Andrea Balboni <sup>a</sup>, Lorenza Urbani <sup>a</sup>, Alessandro Tirolo <sup>b</sup>, Martina Magliocca <sup>a</sup>, Francesco Lunetta <sup>a</sup>, Francesco Dondi <sup>a\*</sup>, Mara Battilani <sup>a</sup>

<sup>a</sup> Department of Veterinary Medical Sciences, *Alma Mater Studiorum*-University of Bologna, Via Tolara di Sopra 50, 40064 Ozzano dell'Emilia, Bologna, Italy

<sup>b</sup> Department of Veterinary Sciences, University of Parma, Strada del Taglio 10, 43126 Parma, Italy

\* Corresponding author

Francesco Dondi

Department of Veterinary Medical Sciences, *Alma Mater Studiorum*-University of Bologna, Via Tolara di Sopra 50, 40064 Ozzano Emilia, Bologna, Italy

*E-mail:* f.dondi@unibo.it

**Online Resource 3** Serum chemistry and urine protein to creatinine ratio (UPC) results of dogs tested positive for *Anaplasma* spp. and *Ehrlichia* spp. infection

| Variables                         | RI        | N  | Positives<br>Median (range) | Positive to <i>A. ph</i><br>Median (range) | Positive to <i>A. pl</i> | Positive to <i>E. ca</i><br>Median (range) | Positive to <i>A. ph</i> and <i>E. ca</i><br>Median (range) | P value |
|-----------------------------------|-----------|----|-----------------------------|--------------------------------------------|--------------------------|--------------------------------------------|-------------------------------------------------------------|---------|
| AST (U/L)                         | 15-52     | 49 | 34 (1.12-2266)              | 32 (1.12-212)                              | 52                       | 34 (24-2266)                               | 38 (23-1106)                                                | 0.4525  |
| ALT(U/L)                          | 15-65     | 61 | 41 (16-2846)                | 42.5 (18-703)                              | 31                       | 40 (16-1851)                               | 45 (18-2846)                                                | 0.8621  |
| ALP(U/L)                          | 12-180    | 49 | 107 (17-1100)               | 179.5 (17-1100)                            | 144                      | 92 (19-1082)                               | 51.5 (28-356)                                               | 0.8005  |
| GGT (U/I)                         | 0-5       | 37 | 2.3 (0.1-17.5)              | 3.1 (0.1-6.5)                              |                          | 2.25 (0.1-11)                              | 1.25 (0.5-17.5)                                             | 0.2619  |
| Glucose (mg/dL)                   | 65-115    | 47 | 93 (32-120)                 | 100 (32-113)                               | 94                       | 93 (66-120)                                | 87.5 (80-119)                                               | 0.7682  |
| Urea (mg/dL)                      | 17-48     | 50 | 32 (14-393)                 | 38.5 (14-393)                              | 32                       | 30.97 (14-122)                             | 27 (15-247)                                                 | 0.6772  |
| Creatinine (mg/dL)                | 0.75-1.4  | 62 | 0.95 (0-11.68)              | 1.155 (0.51-11.68)                         | 0.46                     | 0.94 (0.25-2)                              | 0.755 (0-5.35)                                              | 0.1166  |
| Total bilirubin (mg/dL)           | 0.07-0.33 | 50 | 0.18 (0-17.33)              | 0.18 (0.11-17.33)                          |                          | 0.19 (0-13.68)                             | 0.19 (0-0.29)                                               | 0.6912  |
| Calcium (mg/dL)                   | 9.7-11.0  | 37 | 10.7 (9.3-15)               | 10.7 (9.3-11.3)                            |                          | 10.65 (10-12.9)                            | 10.65 (9.7-15)                                              | 0.7648  |
| Phosphate (mg/dL)                 | 2.65-5.40 | 41 | 4.26 (2.6-15.26)            | 4.26 (2.7-14.36)                           |                          | 4.05 (2.6-7.8)                             | 5.45 (3.42-15.26)                                           | 0.0932  |
| Sodium (mg/dL)                    | 143-151   | 60 | 146 (137-160)               | 146.5 (142-160)                            | 146                      | 146 (137-149)                              | 143 (137-150)                                               | 0.2145  |
| Potassium (mEq/L)                 | 3.8-5.0   | 62 | 4.4 (0.3-6.1)               | 4.45 (3-6.1)                               | 4.4                      | 4.4 (0.3-5.1)                              | 4.65 (3.8-5)                                                | 0.8979  |
| Chloride (mEq/L)                  | 108-118   | 37 | 113.2 (11-122.7)            | 113 (11-119)                               |                          | 113.2 (105-117)                            | 113.8 (107-122.7)                                           | 0.8958  |
| Magnesium (mg/dL)                 | 1.70-2.35 | 32 | 2 (1-3.59)                  | 2.075 (1.84-2.96)                          |                          | 2 (1.6-3.59)                               | 1.985 (1-2.63)                                              | 0.8480  |
| Total protein (g/dL)              | 5.6-7.3   | 61 | 6.73 (3.57-14.39)           | 6.225 (4.47-7.68)                          | 6.35                     | 6.785 (3.57-14.39)                         | 7.045 (5.81-10.74)                                          | 0.0614  |
| Albumin (g/dL)                    | 2.75-3.85 | 62 | 2.44 (1-3.74)               | 2.25 (1.29-3.71)                           | 2.59                     | 2.7 (1.19-3.61)                            | 2.015 (1-3.74)                                              | 0.7128  |
| Albumin to globulin ratio         | 0.75-1.35 | 62 | 0.595 (0-1.13)              | 0.65 (0.33-1.09)                           | 0.6                      | 0.77 (0.1-1)                               | 0.445 (0-1.13)                                              | 0.3556  |
| Total cholesterol (mg/dL)         | 123-345   | 36 | 211 (45-436)                | 221.5 (165-436)                            |                          | 205 (45-372)                               | 200 (76-366)                                                | 0.6997  |
| Urine protein to creatinine ratio | ≤ 0.5     | 58 | 0.4 (0.1-21.1)              | 1.18 (0.1-21.1)                            | 0.59                     | 0.225 (0.1-15.58)                          | 0.6 (0.11-14.9)                                             | 0.1038  |

*A. ph*: *Anaplasma phagocytophilum*; *A. pl*: *Anaplasma platys*; *E. ca*: *Ehrlichia canis*; RI: reference interval; ALP: alkaline phosphatase; ALT: alanine transaminase; AST:

aspartate transaminase; GGT:  $\gamma$ -Glutamyl transferase; N: number of dogs for which the data was available
