# Supplementary material for: Detection of Anaplasma spp. and Ehrlichia spp. in dogs from a veterinary teaching hospital in Italy: a retrospective study 2012–2020
Source: Springer Nature journal article supplement (doi:10.1007/s11259-024-10358-4), 2024-03-27
Supplement: MOESM4 [file 11259_2024_10358_MOESM4_ESM.pdf]

**Detection of *Anaplasma* spp. and *Ehrlichia* spp. in dogs from a veterinary teaching hospital in Italy: a retrospective study 2012-2020**

Veronica Facile <sup>a</sup>, Maria Chiara Sabetti <sup>b</sup>, Andrea Balboni <sup>a</sup>, Lorenza Urbani <sup>a</sup>, Alessandro Tirolo <sup>b</sup>, Martina Magliocca <sup>a</sup>, Francesco Lunetta <sup>a</sup>, Francesco Dondi <sup>a\*</sup>, Mara Battilani <sup>a</sup>

<sup>a</sup> Department of Veterinary Medical Sciences, *Alma Mater Studiorum*-University of Bologna, Via Tolara di Sopra 50, 40064 Ozzano dell'Emilia, Bologna, Italy

<sup>b</sup> Department of Veterinary Sciences, University of Parma, Strada del Taglio 10, 43126 Parma, Italy

\* Corresponding author

Francesco Dondi

Department of Veterinary Medical Sciences, *Alma Mater Studiorum*-University of Bologna, Via Tolara di Sopra 50, 40064 Ozzano Emilia, Bologna, Italy

*E-mail:* f.dondi@unibo.it

**Online Resource 4** Clinical signs of dogs tested positive for *Anaplasma* spp. and *Ehrlichia* spp. infection

| Clinical signs              | N  | Positives  | Positive to <i>A. ph</i> | Positive to <i>A. pl</i> | Positive to <i>E. ca</i> | Positive to <i>A. ph</i> and <i>E. ca</i> | P value |
|-----------------------------|----|------------|--------------------------|--------------------------|--------------------------|-------------------------------------------|---------|
| Pale mucous membranes       | 66 | 15 (22.7%) | 4                        | 0                        | 5                        | 6                                         | 0.6364  |
| Anorexia                    | 66 | 33 (50%)   | 12                       | 0                        | 10                       | 11                                        | 0.5920  |
| Lymphadenomegaly            | 66 | 23 (34.8%) | 6                        | 0                        | 10                       | 7                                         | 0.5922  |
| Cough                       | 66 | 6 (9.1%)   | 3                        | 0                        | 1                        | 2                                         | 0.5288  |
| Depression                  | 66 | 25 (37.9%) | 9                        | 0                        | 9                        | 7                                         | 0.9242  |
| Joint pain/swelling         | 66 | 14 (21.2%) | 6                        | 0                        | 3                        | 5                                         | 0.4179  |
| Neurological signs          | 66 | 2 (3.0%)   | 0                        | 0                        | 1                        | 1                                         | 0.5895  |
| Ocular signs                | 66 | 3 (4.5%)   | 0                        | 0                        | 2                        | 1                                         | 0.3964  |
| Nasal discharge             | 66 | 2 (3.0%)   | 0                        | 0                        | 1                        | 1                                         | 0.5895  |
| Melena                      | 66 | 6 (9.1%)   | 1                        | 0                        | 3                        | 2                                         | 0.6352  |
| Dyspnoea                    | 66 | 4 (6.1%)   | 2                        | 0                        | 1                        | 1                                         | 0.7613  |
| Presence of ticks           | 66 | 10 (15.2%) | 3                        | 0                        | 5                        | 2                                         | 0.5901  |
| Fever*                      | 66 | 28 (42.4%) | 11                       | 0                        | 9                        | 8                                         | 0.6692  |
| PU/PD                       | 66 | 13 (19.7%) | 6                        | 0                        | 3                        | 4                                         | 0.4526  |
| Petechiae                   | 66 | 3 (4.5%)   | 0                        | 0                        | 1                        | 2                                         | 0.2972  |
| Haematuria                  | 66 | 3 (4.5%)   | 1                        | 0                        | 1                        | 1                                         | 0.9947  |
| Epistaxis                   | 66 | 2 (3.0%)   | 1                        | 0                        | 0                        | 1                                         | 0.5527  |
| Vomit                       | 66 | 10 (15.2%) | 3                        | 0                        | 3                        | 4                                         | 0.7648  |
| Skin lesions                | 66 | 3 (4.5%)   | 0                        | 0                        | 1                        | 2                                         | 0.2972  |
| Diarrhoea                   | 66 | 10 (15.2%) | 3                        | 0                        | 4                        | 3                                         | 0.9596  |
| Weight loss                 | 66 | 11 (16.7%) | 6                        | 0                        | 3                        | 2                                         | 0.2564  |
| Abdominal pain              | 66 | 6 (9.1%)   | 2                        | 0                        | 2                        | 2                                         | 0.9818  |
| Congestive mucous membranes | 66 | 2 (3.0%)   | 0                        | 0                        | 2                        | 0                                         | 0.1645  |

*A. ph*: *Anaplasma phagocytophilum*; *A. pl*: *Anaplasma platys*; *E. ca*: *Ehrlichia canis*; N: number of dogs for which the data was available; PU/PD: polyuria/polydipsia

\* Rectal temperature higher than 39.2° C (Miller JB (2014) Hyperthermia and fever. In: Silverstein DC, Hopper K (eds) Small Animal Critical Care Medicine, 2nd edn. Elsevier, St. Louis, pp. 55-59).
