# Supplementary material for: Detection of Anaplasma spp. and Ehrlichia spp. in dogs from a veterinary teaching hospital in Italy: a retrospective study 2012–2020
Source: Springer Nature journal article supplement (doi:10.1007/s11259-024-10358-4), 2024-03-27
Supplement: MOESM5 [file 11259_2024_10358_MOESM5_ESM.pdf]

**Detection of *Anaplasma* spp. and *Ehrlichia* spp. in dogs from a veterinary teaching hospital in Italy: a retrospective study 2012-2020**

Veronica Facile <sup>a</sup>, Maria Chiara Sabetti <sup>b</sup>, Andrea Balboni <sup>a</sup>, Lorenza Urbani <sup>a</sup>, Alessandro Tirolo <sup>b</sup>, Martina Magliocca <sup>a</sup>, Francesco Lunetta <sup>a</sup>, Francesco Dondi <sup>a\*</sup>, Mara Battilani <sup>a</sup>

<sup>a</sup> Department of Veterinary Medical Sciences, *Alma Mater Studiorum*-University of Bologna, Via Tolara di Sopra 50, 40064 Ozzano dell'Emilia, Bologna, Italy

<sup>b</sup> Department of Veterinary Sciences, University of Parma, Strada del Taglio 10, 43126 Parma, Italy

\* Corresponding author

Francesco Dondi

Department of Veterinary Medical Sciences, *Alma Mater Studiorum*-University of Bologna, Via Tolara di Sopra 50, 40064 Ozzano Emilia, Bologna, Italy

*E-mail*: f.dondi@unibo.it

**Online Resource 5** Results obtained by the three different assays in dogs tested positive

| Dogs | RIT | IFAT | PCR |
|------|-----|------|-----|
| 01   | NT  | +    | NT  |
| 02   | NT  | +    | NT  |
| 03   | NT  | +    | NT  |
| 04   | NT  | +    | NT  |
| 05   | NT  | +    | NT  |
| 06   | NT  | +    | NT  |
| 07   | NT  | +    | NT  |
| 08   | NT  | +    | NT  |
| 09   | NT  | +    | NT  |
| 10   | NT  | +    | NT  |
| 11   | NT  | +    | NT  |
| 12   | NT  | +    | NT  |
| 13   | NT  | +    | NT  |
| 14   | NT  | +    | NT  |
| 15   | NT  | +    | NT  |
| 16   | NT  | +    | NT  |
| 17   | NT  | +    | NT  |
| 18   | NT  | +    | NT  |
| 19   | NT  | NT   | +   |
| 20   | NT  | NT   | +   |
| 21   | NT  | +    | NT  |
| 22   | NT  | +    | NT  |
| 23   | NT  | +    | NT  |
| 24   | NT  | +    | NT  |
| 25   | NT  | +    | NT  |
| 26   | NT  | +    | NT  |
| 27   | NT  | +    | NT  |
| 28   | NT  | +    | NT  |
| 29   | NT  | +    | NT  |
| 30   | NT  | NT   | +   |
| 31   | NT  | +    | NT  |
| 32   | NT  | +    | NT  |
| 33   | NT  | +    | NT  |
| 34   | NT  | +    | NT  |
| 35   | NT  | +    | NT  |

|    |    |    |    |
|----|----|----|----|
| 36 | NT | +  | NT |
| 37 | NT | +  | NT |
| 38 | NT | +  | NT |
| 39 | NT | +  | NT |
| 40 | +  | NT | NT |
| 41 | +  | NT | NT |
| 42 | +  | NT | NT |
| 43 | +  | NT | NT |
| 44 | +  | -  | NT |
| 45 | +  | -  | NT |
| 46 | -  | NT | +  |
| 47 | -  | +  | NT |
| 48 | +  | +  | NT |
| 49 | +  | +  | NT |
| 50 | +  | +  | NT |
| 51 | +  | +  | NT |
| 52 | -  | +  | NT |
| 53 | +  | +  | NT |
| 54 | +  | +  | NT |
| 55 | +  | +  | NT |
| 56 | +  | +  | NT |
| 57 | -  | +  | NT |
| 58 | +  | +  | NT |
| 59 | +  | +  | NT |
| 60 | +  | NT | +  |
| 61 | +  | NT | +  |
| 62 | +  | NT | -  |
| 63 | NT | +  | +  |
| 64 | NT | +  | -  |
| 65 | NT | +  | +  |
| 66 | NT | +  | +  |
| 67 | NT | +  | -  |
| 68 | NT | +  | -  |
| 69 | NT | +  | -  |
| 70 | -  | NT | +  |
| 71 | NT | +  | -  |
| 72 | NT | +  | -  |

|    |    |   |   |
|----|----|---|---|
| 73 | NT | + | - |
| 74 | +  | + | - |
| 75 | +  | + | - |
| 76 | +  | + | - |
| 77 | +  | + | - |
| 78 | +  | + | - |
| 79 | +  | + | + |
| 80 | +  | + | - |
| 81 | +  | + | + |
| 82 | -  | - | + |
| 83 | +  | + | - |
| 84 | +  | + | - |
| 85 | +  | + | - |
| 86 | +  | + | - |
| 87 | +  | + | - |
| 88 | +  | + | + |
| 89 | +  | + | - |
| 90 | -  | + | - |
| 91 | +  | + | + |
| 92 | +  | + | - |
| 93 | +  | + | - |
| 94 | +  | + | - |

IFAT: indirect fluorescent antibody test; NT: not tested; PCR: polymerase chain reaction, RIT: rapid immunoenzymatic test; +: positive result; -: negative result
